# Supplementary material
Source: publisher site journal article supplement (https://www.dovepress.com/article/285742)
Supplement: Supplementary file 1 [file get_supplementary_file.php]

# Supplementary Material – Machine Learning

## Machine Learning Overview

Machine learning involves using computers and algorithms to process large amounts of data (observations, patient characteristics, and measurements) and identify patterns without explicit human programming.1 The strength of machine learning is its ability to sieve through massive amounts of data to find new information and insights by iteratively improving its model without assumed relationships. Since the methods perform without explicit programming, the results require an inspection from a human expert to determine whether the algorithms are performing as expected. Interpretable machine learning algorithms can simplify this task. Machine learning algorithms can model and provide insights into a very wide range of data, including genomics,2–4 images,5–7 sound recordings,8,9 vital signs,10 and electronic health records data collected in primary,11,12 secondary,13 and tertiary care.14

Machine learning is an umbrella term, consisting of tools and techniques that use data to learn how to perform a given task. It is commonly used in data science to model and describe large amounts of data, and to predict events or measurements of interest without any assumption of the relationship between the predictors and the predictions (a priori knowledge). Also, it can model very complex, non-linear, relationships that are not possible with regression analysis. Although most machine learning algorithms applied to asthma management with mHealth use traditional supervised and unsupervised learning techniques, some studies have also used various deep learning approaches (see Supplementary Figures 1 and 2 for a schematic overview of machine learning). In the current study, we refer to traditional machine learning methods as those that require explicit feature engineering (either done manually or using additional machine learning algorithms for feature extraction and selection). Traditional machine learning methods include supervised learning techniques such as logistic regression, support vector machine (SVM), and decision trees. In contrast, increasingly popular methods (such as deep learning) creates new features within the model while finding the best fit to the data.15 Although, deep learning was conceptualized decades ago,15,16 it has only become computationally feasible around the turn of the millennium. It can be used to model the same data as traditional machine learning with better performance and without prior domain knowledge, but the models are harder to interpret, which has limited its widespread adoption.

Supervised learning refers to algorithms that learn to label or categorize data that is already labelled. This approach is suitable for tasks that have a well-defined goal such as predicting outcomes. Unsupervised learning, on the other hand, refers to algorithms that describe patterns and structures in the data without following the lead of labels or categories. Such methods typically require large amount of data. If only some data is labelled, such as with medical images that requires an expert to label, semi-supervised learning can be used to leverage the benefits of supervised and unsupervised learning. Reinforcement learning refers to algorithms that examines how a computer agent would interact with an environment to maximize a reward. An example application of reinforcement learning is the AlphaGo Zero that learnt to play the board game of Go at a super-human level through self-play with no knowledge but the rules of the game.17 Deep learning is a class of machine learning algorithms that have been driving the latest wave of AI publicity, because they can be applied to almost any application given the right data and sufficient computing power.

A common challenge to machine learning is overfitting, which is where the model is trained to the data too closely such that its predictions on new data becomes incorrect. Including features selection and feature extraction in the data pre-processing stage can tackle this challenge. Feature selection refers to selecting a few features in the dataset for training, which can also be used to better understand the patterns displayed in the data. Feature extraction or feature engineering refers to generating new features based on the original features in the dataset to summarize several features, such as computing linear combinations of the features.

## Supervised Learning

Supervised learning finds a mathematical function to link the data with known labels and is suitable for tasks that have a well-defined goal. For example, supervised learning can be used to link data to whether (or not) a patient has an asthma attack. Generally, supervised learning is used for two types of tasks: classification and regression. Many supervised learning algorithms can be used for both classification tasks that use categorical labelled data (such as absence or presence of an asthma attack) and regression tasks that use continuous labelled data (such as serial peak flows). There are three general steps in developing a supervised learning algorithm: 1) define training and testing datasets, 2) fit machine learning model to training data, 3) evaluate the model’s performance using the testing set (see Supplementary Figure 3).

The simplest supervised learning algorithm is linear regression, which fits a straight line over the data, then a decision boundary is used to decide which class the data belongs to. The decision boundary is a point on the line that is chosen to split between two classes. Like linear regression, logistic regression also fits a line over the data, but an S-shaped line (sigmoid), which is particularly useful in classification tasks.18 A challenge with logistic regression, and machine learning algorithms in general, is that it could overfit the data, meaning it is only applicable to one set of training data and not to new unseen data. One method that is used to reduce overfitting is Least Absolute Shrinkage and Selection Operator (LASSO). The LASSO technique involves eliminating features one-by-one, starting with the features of least predictive power, thereby reducing the number of features used to model the data.19 Although this reduces the model’s ability to discern details in the training data, those details could be unique to the training data and not appear in the testing data. Logistic regression, linear regression, and LASSO were used in nine papers.20–28

Where linear and logistic regression fit a line to the data, Support Vector Machine (SVM) fits the decision boundary line to best separate the labelled data. If the data to model the label consists of more than two variables, then a line in a higher dimension (hyperplane) is used to separate the labelled data.18 SVMs were used in five papers.21,24,29–31

Another supervised learning method is decision trees, which use a series of decisions to separate the data. Decisions can be binary, using a decision boundary, or non-binary with categorical data.32 Random forest algorithms are an extension of decision trees. These algorithms train an ensemble of decision trees on random subsets of the data and makes a prediction based on the average of the ensemble of decision trees. Gradient boosting is another ensemble method that uses multiple decision trees, it iteratively adds decision trees with a single split to the model to refine its decision making in more intricate areas of the data. However, as a trade-off for better predictions, random forests and gradient boosting are harder to interpret than decision trees and are known as a “black box” method.33 Decision tree-based methods were used in 10 papers.20,21,24,30,34–39

Compared to the deterministic methods discussed so far, Naive Bayes is a probabilistic method that fits a probability of being in each class; the naive describes the assumption that all variables are independent.18 Naive Bayes is the simplest form of a Bayesian network, which is a network that describe the probabilistic relation between variables of the dataset. Adaptive Bayesian Networks starts with a naïve Bayes model. Iteratively features are added to the Bayesian network until the predictive accuracy cannot be improved.40 Bayesian methods were used in four papers.20,21,24,40

The k-nearest neighbors (kNN) classification algorithm is a modeless supervised learning algorithm, which considers each new point relative to the k-nearest points of the training set and assigns a class accordingly.18 kNN also has applications in semi-supervised learning, where it can propagate the labels to unlabelled data. kNN were used in two papers.24,34

## Unsupervised Learning

Unsupervised learning describe patterns and structures in the data without following the lead of labels or categories defined by a human. Unsupervised learning is often used to derive data-driven clusters of patients or variables or to reduce the dimension of the dataset. Clustering refers to the task of finding natural groupings in the data, where observations in the same cluster are similar and observations in different clusters are dissimilar. Dimension reduction refers to the task of finding a new set of variables or dimensions that would represent the properties of the original space, but with fewer dimensions.

Some common unsupervised learning algorithms include k-means clustering, Gaussian Mixture Models (GMM), and principal component analysis (PCA).

k-means clustering is one of the most common clustering algorithms, favored for its efficiency. It creates k centroids then assigns the data into k clusters based on the closest distance between observations and centroids.41 K-means were used in two papers.38,42

Gaussian mixture models (GMMs) are similar to k-means, but instead of a definite assignment, it gives a probability of being in each class. Assuming the data is composed of multiple Gaussian or Normal distributions, the algorithm finds the location and shape of the distributions seen in the data.18 Each distribution represents an unsupervised cluster in the data. However, once the distributions have been fit, GMMs can also be used in supervised learning tasks by defining decision boundaries. GMMs were used in one paper.43

PCA transforms the feature dimensions into principal components, which are a new set of dimensions that maximizes the variation seen in the data and are linear combinations of the feature dimension.18 PCA is a method that is commonly used to visualize the data and perform dimensionality reduction. PCA were used in four papers.20,22,35,38

## Deep Learning and Reinforcement Learning

Deep learning refers to a class of algorithms that use artificial neural networks (ANN) as a building block. Such algorithms have many parameters to optimize, and they are often computationally intensive. Consisting of many layers, each layer has units that represent information; by increasing the number of layers, more complex information can be represented by the algorithm. Deep learning algorithms can be used for supervised and unsupervised learning tasks.

The prototypical artificial neural network is formed of three types of layers of nodes; beginning with the input layer, followed by hidden layers, and finally an output layer.18 The nodes of the input layer could represent the features of the data or the pixels of a picture. In all other layers, each node is a function processing the inputs from the previous layer and giving an output for the next layer. The final output layer gives the predictions or end-result of the model.

In a feedforward fully-connected neural network architecture, each layer of nodes connects to the next layer of nodes by an edge to every node on the next layer. This means that each node represents different information based on the weight assigned to each of the nodes in the previous layer. In the training process, the weight or importance of each node and edge is adjusted (typically using gradient descent and backpropagation) to match the training label. Compounding the layers of nodes can be interpreted as each progressive layer of the ANN representing higher levels of information, but uncovering its decision process is difficult and the methods are generally considered difficult to interpret. However, model-agnostic methods can be used to interpret the decision making process of the ANN, such as extracting the most important features.33

Recurrent neural network (RNN) (such as long short-term memory (LSTM)44), in contrast to a feedforward neural network, can consider sequential data by feeding the results of the previous time step to the next. Other more complex ANN architectures can combine different types of layers (such as fully connected layer (or dense layer), recurrent layer, convolutional layer, pooling layer and deconvolutional layer) to manipulate different data types in different ways. When there are many layers to the ANN, the algorithms are commonly referred to as deep learning. Forms of deep learning were used in two papers.43,45

Reinforcement learning algorithms or agents iteratively take an action to interact with the environment and receive a reward for the action and an updated state from the environment. Depending on the policy of the agent, the reward may or may not affect the agent’s next action. Some policies focus first on learning about the environment before maximizing its reward, while others balance exploring and maximizing reward. Regardless, all agents will have an understanding of the environment represented mathematically as a Q-function, the reward that is given for taking some action at some state.46 None of the identified papers used reinforcement learning.

## Performance Evaluation

The performance of a machine learning algorithm, especially in supervised learning, is measured using many metrics, such as specificity, sensitivity, confusion matrix, and area under the Receiver Operating Characteristic (ROC) curve (AUC). These metrics require a ground truth to measure the predictions against. Typically, the dataset is split into training and testing data, and the testing data are kept aside until the evaluation stage. See Supplementary Figure 3 for a template pipeline of developing a supervised learning algorithm.

In classification tasks, a confusion matrix is useful in assessing where the algorithm is performing well or needs improving. For two classes, such as asthma attack and no attack, the confusion matrix has four parts: true positive (TP), false positive (FP), false negative (FN), and true negative (TN). True and false refers to whether the prediction is correct compared to the ground truth. The positive class is often the event of interest, such as an asthma attack, and the negative class is the absence of the event. See Table 1 for an example confusion matrix.

Table 1: Example confusion matrix for two classes

|  |  | Ground truth | |  |
| --- | --- | --- | --- | --- |
|  |  | Positive (attack occurred) | Negative (good control) |  |
| Prediction | Positive (attack predicted) | True Positive (predicted attack and had an attack) | False Positive (predicted attack but no attack occurred) | Precision = |
| Negative (good control predicted) | False Negative (good control predicted but had an attack) | True Negative (good control predicted and good control occurred) |  |
|  |  | Sensitivity = | Specificity = | Accuracy = |

The accuracy is the measure of the proportion of predictions that are correct out of all predictions. Mathematically this is equal to (TP + TN) / (TP + FP + FN + TN). Accuracy is a commonly used performance metric. However, the use of this metric can lead to over-optimistic interpretation if one of the two categories in a classification task contains most of the data. In the case of asthma attack prediction (a relatively rare event), a prediction model could predict everyone as not having any asthma attack and still be accurate most of the time. Consequently, we need to consider the balance of sensitivity, specificity, and precision when evaluating the performance of classification algorithms in such contexts. The sensitivity is the measure of how many positive outcomes were correctly identified (e.g., of all attacks, how many were correctly predicted and by implication how many were missed). Mathematically sensitivity is TP / (TP + FN). The specificity is the measure of how many negative results were correctly identified and its ability to avoid false alarms (e.g., of all patients with good control, how many were correctly identified as being well controlled). Mathematically, specificity is TN / (FP + TN). The precision is the measure of correct positive predictions (e.g., of all predicted asthma attacks, how many were actual attacks). Mathematically, precision is TP / (TP + FP).

Moving the decision boundary can vary the balance between sensitivity and specificity; as one goes up, the other goes down. The ROC curve represents all possible combinations of sensitivity and specificity attained with all possible decision boundaries. The AUC summarizes the ROC curve in a single value. This summary value is useful when comparing different algorithms: a perfect classifier would have an AUC of 100%, and random guessing would have an AUC of 50%. However, one must be careful when comparing it between studies, as the definition of a positive event might differ.

Other than the performance measures described, there are additional performance measures used. There is no ideal performance metric, and every metric has its own strengths and limitations. It is often a good strategy to use multiple metrics when assessing the performance of any algorithm.

## References

1. Samuel AL. Some Studies in Machine Learning Using the Game of Checkers. *IBM J Res Dev*. 1959;3(3):210-229. doi:10.1147/rd.33.0210

2. Zhou Y, Zhao L, Zhou N, et al. Predictive Big Data Analytics using the UK Biobank Data. *Sci Rep*. 2019;9(1):6012. doi:10.1038/s41598-019-41634-y

3. Senior AW, Evans R, Jumper J, et al. Improved Protein Structure Prediction Using Potentials from Deep Learning. *Nature*. 2020;577(7792):706-710. doi:10.1038/s41586-019-1923-7

4. Caravagna G, Giarratano Y, Ramazzotti D, et al. Detecting Repeated Cancer Evolution from Multi-Region Tumor Sequencing Data. *Nat Methods*. 2018;15:707-714. doi:10.1038/s41592-018-0108-x

5. Gornale SS, Patravali PU, Manza RR. Detection of Osteoarthritis using Knee X-Ray Image Analyses: A Machine Vision based Approach. *Int J Comput Appl*. 2016;145(1):20-26. doi:10.5120/ijca2016910544

6. Falcini F, Lami G, Costanza AM. Deep Learning in Automotive Software. *IEEE Softw*. 2017;34(3):56-63. doi:10.1109/MS.2017.79

7. Giarratano Y, Bianchi E, Gray C, et al. Automated Segmentation of Optical Coherence Tomography Angiography Images: Benchmark Data and Clinically Relevant Metrics. *Transl Vis Sci Technol*. 2020;9(13):5. doi:10.1167/tvst.9.13.5

8. Palaniappan R, Sundaraj K, Ahamed NU. Machine Learning in Lung Sound Analysis: a Systematic Review. *Biocybern Biomed Eng*. 2013;33(3):129-135. doi:10.1016/j.bbe.2013.07.001

9. Li R, Jiang J-Y, Wu X, Hsieh C-C, Stolcke A. Speaker Identification for Household Scenarios with Self-Attention and Adversarial Training. In: *Interspeech 2020*. ISCA; 2020:2272-2276. doi:10.21437/Interspeech.2020-3025

10. Shah SA, Velardo C, Farmer A, Tarassenko L. Exacerbations in Chronic Obstructive Pulmonary Disease: Identification and Prediction Using a Digital Health System. *J Med Internet Res*. 2017;19(3):e69. doi:10.2196/jmir.7207

11. Hill NR, Ayoubkhani D, McEwan P, et al. Predicting Atrial Fibrillation in Primary Care Using Machine Learning. *PLoS One*. 2019;14(11):e0224582. doi:10.1371/JOURNAL.PONE.0224582

12. Wang Z, Shah AD, Tate AR, Denaxas S, Shawe-Taylor J, Hemingway H. Extracting Diagnoses and Investigation Results from Unstructured Text in Electronic Health Records by Semi-Supervised Machine Learning. *PLoS One*. 2012;7(1):e30412. doi:10.1371/journal.pone.0030412

13. Shah SA. Vital Sign Monitoring and Data Fusion for Paediatric Triage. [PhD Thesis]. Published online 2012. Accessed October 25, 2021. https://ora.ox.ac.uk/objects/uuid:80ae66e3-849b-4df1-b064-f9eb7530200d

14. Shah SA, Brown P, Gimeno H, Lin J-P, McClelland VM. Application of Machine Learning Using Decision Trees for Prognosis of Deep Brain Stimulation of Globus Pallidus Internus for Children With Dystonia. *Front Neurol*. 2020;11:825. doi:10.3389/fneur.2020.00825

15. Rumelhart DE, Hinton GE, Williams RJ. Learning Representations by Back-Propagating Errors. *Nature*. 1986;323(6088):533-536. doi:10.1038/323533a0

16. McCulloch WS, Pitts W. A Logical Calculus of the Ideas Immanent in Nervous Activity. *Bull Math Biophys*. 1943;5(4):115-133. doi:10.1007/BF02478259

17. Silver D, Schrittwieser J, Simonyan K, et al. Mastering the Game of Go Without Human Knowledge. *Nature*. 2017;550(7676):354-359. doi:10.1038/nature24270

18. Bishop CM. *Pattern Recognition and Machine Learning*. springer; 2006. ISBN:9780387310732

19. Tibshirani R. Regression Shrinkage and Selection Via the Lasso. *J R Stat Soc Ser B*. 1996;58(1):267-288. doi:10.1111/j.2517-6161.1996.tb02080.x

20. Zhang O, Minku LL, Gonem S. Detecting Asthma Exacerbations Using Daily Home Monitoring and Machine Learning. *J Asthma*. 2021;58(11):1518-1527. doi:10.1080/02770903.2020.1802746

21. Tsang KCH, Pinnock H, Wilson AM, Ahmar Shah S. Application of Machine Learning to Support Self-Management of Asthma with mHealth. In: *2020 42nd Annual International Conference of the IEEE Engineering in Medicine & Biology Society (EMBC)*. IEEE; 2020:5673-5677. doi:10.1109/EMBC44109.2020.9175679

22. Tenero L, Sandri M, Piazza M, Paiola G, Zaffanello M, Piacentini G. Electronic Nose in Discrimination of Children With Uncontrolled Asthma. *J Breath Res*. 2020;14(4):046003. doi:10.1088/1752-7163/ab9ab0

23. Castner J, Jungquist CR, Mammen MJ, Pender JJ, Licata O, Sethi S. Prediction Model Development of Women’s Daily Asthma Control Using Fitness Tracker Sleep Disruption. *Hear Lung*. 2020;49(5):548-555. doi:10.1016/j.hrtlng.2020.01.013

24. Khasha R, Sepehri MM, Mahdaviani SA. An Ensemble Learning Method for Asthma Control Level Detection with Leveraging Medical Knowledge-Based Classifier and Supervised Learning. *J Med Syst*. 2019;43(6):158. doi:10.1007/s10916-019-1259-8

25. Adhi Pramono RX, Anas Imtiaz S, Rodriguez-Villegas E. Automatic Identification of Cough Events from Acoustic Signals. In: *2019 41st Annual International Conference of the IEEE Engineering in Medicine and Biology Society (EMBC)*. IEEE; 2019:217-220. doi:10.1109/EMBC.2019.8856420

26. Adhi Pramono RX, Anas Imtiaz S, Rodriguez-Villegas E. Automatic Cough Detection in Acoustic Signal using Spectral Features. In: *2019 41st Annual International Conference of the IEEE Engineering in Medicine and Biology Society (EMBC)*. IEEE; 2019:7153-7156. doi:10.1109/EMBC.2019.8857792

27. Infante C, Chamberlain DB, Kodgule R, Fletcher RR. Classification of Voluntary Coughs Applied to The Screening of Respiratory Disease. In: *2017 39th Annual International Conference of the IEEE Engineering in Medicine and Biology Society (EMBC)*. IEEE; 2017:1413-1416. doi:10.1109/EMBC.2017.8037098

28. Taylor TE, Lacalle Muls H, Costello RW, Reilly RB. Estimation of Inhalation Flow Profile Using Audio-Based Methods to Assess Inhaler Medication Adherence. Kou YR, ed. *PLoS One*. 2018;13(1):e0191330. doi:10.1371/journal.pone.0191330

29. Chen H, Yuan X, Li J, Pei Z, Zheng X. Automatic Multi-Level In-Exhale Segmentation and Enhanced Generalized S-Transform for Wheezing Detection. *Comput Methods Programs Biomed*. 2019;178:163-173. doi:10.1016/j.cmpb.2019.06.024

30. Li K, Habre R, Deng H, et al. Applying Multivariate Segmentation Methods to Human Activity Recognition From Wearable Sensors’ Data. *JMIR mHealth uHealth*. 2019;7(2):e11201. doi:10.2196/11201

31. Azam MA, Shahzadi A, Khalid A, Anwar SM, Naeem U. Smartphone Based Human Breath Analysis from Respiratory Sounds. In: *2018 40th Annual International Conference of the IEEE Engineering in Medicine and Biology Society (EMBC)*. IEEE; 2018:445-448. doi:10.1109/EMBC.2018.8512452

32. Quinlan JR. Induction of Decision Trees. *Mach Learn*. 1986;1(1):81-106. doi:10.1007/BF00116251

33. Molnar C. *Interpretable Machine Learning: A Guide for Making Black Box Models Explainable*. 2nd ed.; 2022. Accessed January 10, 2022. https://christophm.github.io/interpretable-ml-book

34. Chen A, Zhang J, Zhao L, et al. Machine-Learning Enabled Wireless Wearable Sensors to Study Individuality of Respiratory Behaviors. *Biosens Bioelectron*. 2020;173:112799. doi:10.1016/j.bios.2020.112799

35. van Vliet D, Smolinska A, Jöbsis Q, et al. Can Exhaled Volatile Organic Compounds Predict Asthma Exacerbations in Children? *J Breath Res*. 2017;11(1):016016. doi:10.1088/1752-7163/aa5a8b

36. Huffaker MF, Carchia M, Harris BU, et al. Passive Nocturnal Physiologic Monitoring Enables Early Detection of Exacerbations in Children with Asthma. A Proof-of-Concept Study. *Am J Respir Crit Care Med*. 2018;198(3):320-328. doi:10.1164/rccm.201712-2606OC

37. Purnomo AT, Lin D-B, Adiprabowo T, Hendria WF. Non-Contact Monitoring and Classification of Breathing Pattern for the Supervision of People Infected by COVID-19. *Sensors*. 2021;21(9):3172. doi:10.3390/s21093172

38. Tibble H, Chan A, Mitchell EA, et al. A Data-Driven Typology of Asthma Medication Adherence Using Cluster Analysis. *Sci Rep*. 2020;10(1):14999. doi:10.1038/s41598-020-72060-0

39. Tinschert P, Rassouli F, Barata F, et al. Nocturnal Cough and Sleep Quality to Assess Asthma Control and Predict Attacks. *J Asthma Allergy*. 2020;13:669-678. doi:10.2147/JAA.S278155

40. Finkelstein J, Jeong I cheol. Machine Learning Approaches to Personalize Early Prediction of Asthma Exacerbations. *Ann N Y Acad Sci*. 2017;1387(1):153-165. doi:10.1111/nyas.13218

41. Hartigan JA, Wong MA. Algorithm AS 136: A K-Means Clustering Algorithm. *Appl Stat*. Published online 1979. doi:10.2307/2346830

42. Tignor N, Wang P, Genes N, et al. Methods For Clustering Time Series Data Acquired from Mobile Health Apps. In: *Biocomputing 2017*. Vol 22. WORLD SCIENTIFIC; 2017:300-311. doi:10.1142/9789813207813_0029

43. Vatanparvar K, Nemati E, Nathan V, Rahman MM, Kuang J. CoughMatch – Subject Verification Using Cough for Personal Passive Health Monitoring. In: *2020 42nd Annual International Conference of the IEEE Engineering in Medicine & Biology Society (EMBC)*. IEEE; 2020:5689-5695. doi:10.1109/EMBC44109.2020.9176835

44. Hochreiter S, Schmidhuber J. Long Short-Term Memory. *Neural Comput*. 1997;9(8):1735-1780. doi:10.1162/neco.1997.9.8.1735

45. Prinable J, Jones P, Boland D, Thamrin C, McEwan A. Derivation of Breathing Metrics From a Photoplethysmogram at Rest: Machine Learning Methodology. *JMIR mHealth uHealth*. 2020;8(7):e13737. doi:10.2196/13737

46. Sutton RS, Barto AG. *Reinforcement Learning: An Introduction*. 2nd ed. The MIT Press; 2018. ISBN:978-0262193986

# Supplementary Material – Figures

Supplementary Figure 1: Categories of machine learning


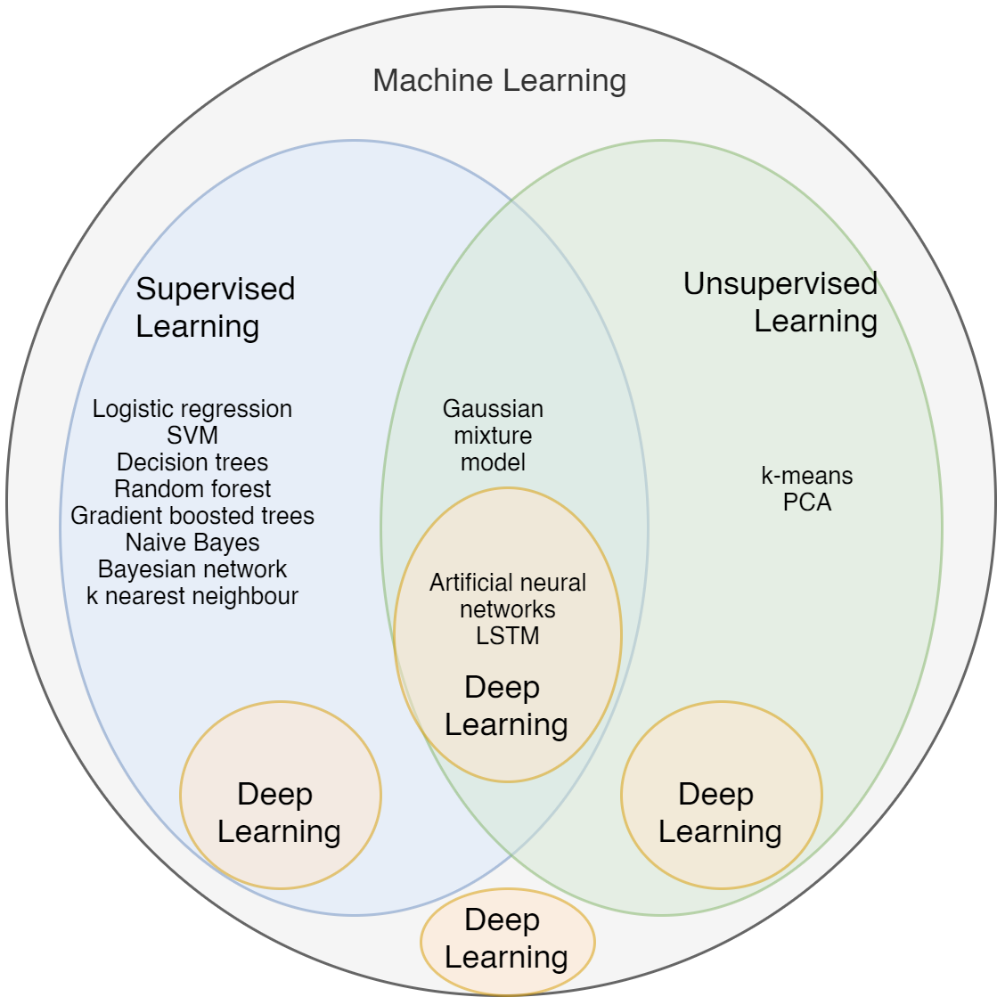


Supplementary Figure 2: Machine learning algorithms


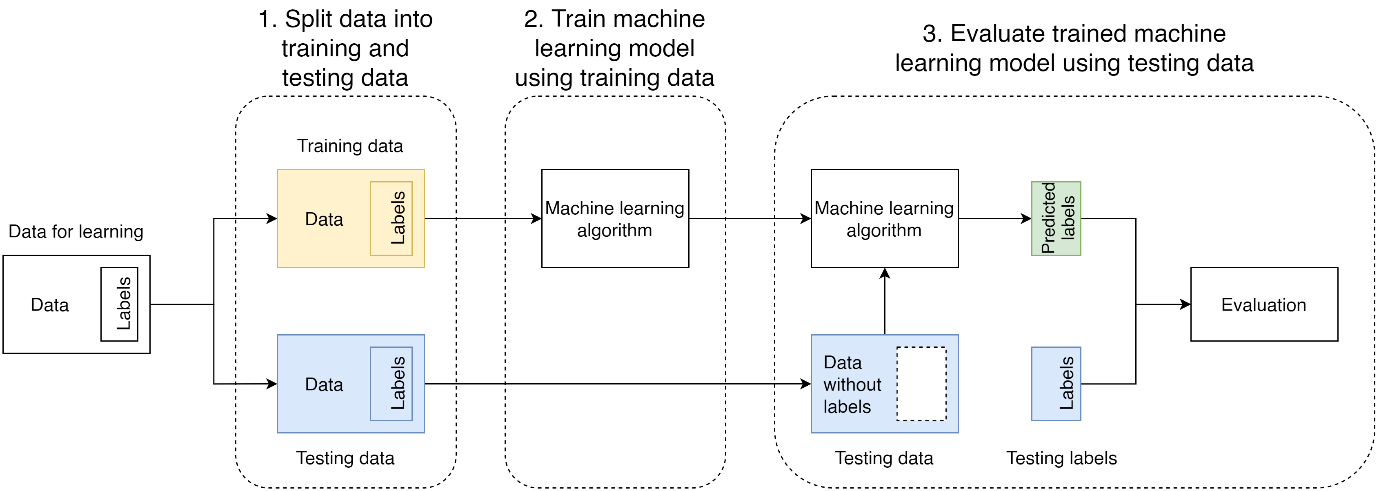


Supplementary Figure 3: General process of developing a supervised learning algorithm. For most applications, there is a separate process for preparing the “Data for learning” known as pre-processing, which can include digital signal processing and missing data imputation. The input data (not including the labels) are commonly referred to as predictors or features, where the labels are often referred to as target, output variable, or outcome.
